# 1 Probing Causality of the Brainstem-Hypothalamic 2 Murine Models of Sleep-Wake Regulation 3

4 **Authors:** Fatemeh Bahari<sup>1,2\*</sup>, Myles W. Billard<sup>1,2</sup>, John Kimbugwe<sup>1,2</sup>, Carlos Curay<sup>1</sup>, Glenn  
5 D.R. Watson<sup>1,3</sup>, Kevin D. Alloway<sup>1,3</sup>, Bruce J. Gluckman<sup>1,2,4,5\*</sup>

## 6 **Affiliations:**

7 <sup>1</sup>Center for Neural Engineering, Pennsylvania State University, University Park, PA 16802, USA

8 <sup>2</sup>Department of Engineering Science and Mechanics, Pennsylvania State University, University  
9 Park, PA 16802, USA

10 <sup>3</sup>Neural and Behavioral Sciences, College of Medicine, Pennsylvania State University, Hershey,  
11 PA 17033, USA

12 <sup>4</sup>Department of Neurosurgery, College of Medicine, Pennsylvania State University, Hershey, PA  
13 17033, USA

14 <sup>5</sup>Department of Bioengineering, Pennsylvania State University, University Park, PA 16802, USA

15 \*Corresponding authors email addresses: Fatemeh Bahari, [fa.bahari92@gmail.com](mailto:fa.bahari92@gmail.com), Bruce J.  
16 Gluckman [BruceGluckman@psu.edu](mailto:BruceGluckman@psu.edu)  
17

## 18 **Abstract**

19 Sleep-wake regulation is thought to be governed by interactions among several nuclei in midbrain,  
20 pons, and hypothalamic regions. Determination of the causal role of these nuclei in state  
21 transitions requires simultaneous measurements from the nuclei with sufficient spatial and  
22 temporal resolution. We obtained long-term experimental single- and multi-unit measurements  
23 simultaneously from multiple nuclei of the putative hypothalamic and brainstem sleep-wake  
24 regulatory network in freely behaving rats. Cortical and hippocampal activity, along with head  
25 acceleration were also acquired to assess behavioral state. We found that although the average  
26 activity of cell groups during states matches the patterns presented previously in brief recordings  
27 of individual nuclei in head-fixed animals, the firing rates with respect to cortical and behavioral  
28 signs of state transitions differ in critical ways. Our findings pose fundamental questions about  
29 the neural mechanisms that maintain specific states and the neural interactions that lead to the  
30 emergence of new states.

## 31 **Introduction**

32 Sleep-wake states are thought to be driven by basal forebrain, brainstem, and hypothalamic  
33 circuits<sup>1-8</sup>. These states are predominantly characterized from electroencephalogram (EEG) and  
34 electromyogram (EMG) recordings, with transitions between states described as discrete  
35 mechanisms<sup>4,9-12</sup>. Models of underlying network mechanisms of sleep-wake regulation have  
36 attempted to describe and reproduce these discrete transitions<sup>13-18</sup>. To do so, these models often  
37 invoke co-inhibitory dynamics of sleep-wake regulatory cell groups in configurations analogous to  
38 electrical flip-flops<sup>9,11,19</sup>. However, observations of cell group activity and involvement are derived  
39 from experiments conducted on head-fixed<sup>20-24</sup> or lightly anesthetized animals<sup>3,25</sup>, via short  
40 recordings, and often within novel environments<sup>5,6,12,26-28</sup>. These conditions inherently modulate  
41 sleep-wake patterns<sup>29</sup> and/or limit the time-resolution required for determination of the  
42 relationship between firing rate and state transitions. To investigate the neural basis of sleep-  
43 wake transitions in normal conditions, we chronically recorded single- and multi-unit activity  
44 simultaneously from multiple hypothalamic and brainstem sleep-wake regulatory nuclei in freely  
45 behaving rats. Cortical and hippocampal activity, along with head acceleration were also acquired  
46 to assess behavioral state. Here, we report a comprehensive network analysis of the sleep-wake  
47 regulatory system in freely behaving rats. Our findings address current hypotheses regarding the  
48 causal role of brainstem and hypothalamic cell groups in initiating naturally emerging transitions  
49 between states of vigilance.

## 50 **Methods**

51 All animal work was approved by and performed under the oversight of the Institutional Animal  
52 Care and Use Committee at the Pennsylvania State University.

53 To study the sleep-wake regulatory network as well as to identify sleep-wake transitions we used  
54 the systemDrive<sup>30</sup>: a customizable micro-wire multitrode microdrive for targeting multiple cell  
55 groups along non-parallel non-co-localized trajectories. Animals were implanted with the

56 systemDrive's micro-wire multitrodes targeting several sleep-wake regulatory cell-groups. The  
57 systemDrive houses additional screw electrodes for electrocorticography (ECoG), and fixed depth  
58 electrodes for hippocampal local field potential (LFP) recordings. Following implantation, animals  
59 were returned to their home-cages and long-term continuous recordings started after ample post-  
60 operation recovery time (7 days).

61 In accordance with common microdrive system use, we advanced electrodes along the dorsal-  
62 ventral axis of each targeted cell group and recorded neuronal activity of the area for continuous  
63 periods of 3 to 10 days. The procedure was repeated until the entire depth of the target was  
64 covered. Single- and/or multi-unit activity, when present, was extracted for all channels in each  
65 target. State of vigilance (SOV) was determined from simultaneous measurements of ECoG,  
66 hippocampal LFP, head acceleration<sup>31</sup>, and time-matched video. The firing rate of each neuron  
67 was then analyzed as a function of different SOVs and their intervening transitions.

### 68 **Animal Surgery and Care:**

69 Surgical and implantation techniques are previously described<sup>30</sup>. Briefly, male and female Long  
70 Evans rats weighing between 275-350 grams were implanted for continuous recordings that  
71 lasted for a duration of 2-6 weeks.

72 Recording electrodes include micro-wire bundles for monitoring brainstem neuronal activity, as  
73 well as hippocampal LFP pairs and ECoG screws for determining the EEG and behavioral state.  
74 For observation of sleep-wake regulatory network (SWRN) dynamics, we recorded from five  
75 brainstem structures with target coordinates referenced to intraural line (IA) according to the  
76 Paxinos-Watson rat brain atlas:

77 Dorsal Raphe (DR) [AP: +1.5 mm, ML: 0 mm, DV: -3.6 mm, 21.33° or -21.33°]

78 PeduncloPontine Tegmentum (PPT) [AP: +0.5 mm, ML: ±2 mm, DV: -3.6 mm]

79 LateroDorsal Tegmentum (LDT) [AP: +0.36 mm, ML: ±0.8 mm, DV: -3 mm, 13.65° or -13.65°]

80 VentroLateral Preoptic Area (VLPO) [AP: +8.76 mm, ML:  $\pm$ 1 mm, DV: -0.75 mm, 15.52°]

81 Locus Coeruleus (LC) [AP: -0.72 mm, ML: +1.3 mm, DV: -3.2 mm]

82 A number of these nuclei are located near sensitive structures such as the sagittal sinus and  
83 lateral ventricles. Therefore, trajectories were chosen to avoid these sensitive structures and allow  
84 enough room on the cranium for all electrodes.

85 For hippocampal LFPs, two pairs of custom-made 50  $\mu$ m iridium oxide deposited micro-reaction  
86 chamber ( $\mu$ RC) electrodes formed from gold coated stainless-steel wire <sup>32</sup> with ends staggered  
87 by 250-300  $\mu$ m were implanted bilaterally in the dorsal hippocampus at coordinates [AP: +5 mm,  
88 ML:  $\pm$ 3 mm, DV: -2.5 mm from the cortex]. For ECoG, four stainless steel screws (one-eighth inch  
89 18-8 stainless steel 0-80 cortical screws, McMaster-Carr) were implanted at coordinates [AP: +7.5  
90 mm, ML:  $\pm$ 4 mm], [AP: +3 mm, ML: -4 mm], and [AP: +2.5 mm, ML: +3 mm]. Two additional  
91 stainless screws were implanted at [AP: +11 mm, ML:  $\pm$ 3 mm] for ground and reference.

92 After completing surgery, animals were returned to their individual home-cages for recovery with  
93 free access to food and water. Following recovery, the animals were cabled for continuous video  
94 and EEG monitoring. Every 3 to 10 days the animals were briefly anesthetized to advance the  
95 micro-wire electrodes incrementally between recording sessions and until they covered the entire  
96 dorsal-ventral length of the structures of interest.

### 97 **Histological Techniques:**

98 At the completion of recordings animals were sacrificed and their brains were histologically  
99 processed to examine the electrode tracks with respect to the targeted brain structures. Details  
100 and results of the histological methods and analysis are previously described <sup>30</sup>.

### 101 **Data Acquisition:**

102 All rats were housed individually in custom-made plexiglass cages with dimensions  
103 9" (w) x 15" (d) x 24" (h). At the first electrode driving session, each animal received a differential

104 or referential digitizing head-stage amplifier with 3-axis accelerometer (RHD2116 or RHD2132,  
105 Intan Technologies, Los Angeles, CA) which can directly connect to an electrode interface board  
106 on the systemDrive. The amplifier was connected to a data acquisition board (RHD2000  
107 Evaluation System, Intan Technologies) via 3' lightweight serial-peripheral interface (SPI) cable  
108 (Intan Technologies) and in-house adapted low-torque commutator (SRA-73540-12, Moog Inc.).  
109 Hippocampal LFP, ECoG, as well as single and multi-unit signals were simultaneously acquired  
110 at 30,000 samples per second (SPS) and high-pass filtered at 1 Hz. Head acceleration  
111 measurements were sampled at a rate of 7500 Hz. A 12 hour light/dark cycle was maintained with  
112 the lights on between 6 am and 6 pm. Video monitoring, at 3 frames per second, began on the  
113 day of implantation and continued within each recording session. Video files were stored in one-  
114 hour-long files, while biopotentials and head acceleration data were stored in 5 to 15-minute-long  
115 files for further analysis.

116 To measure single- and multi-unit activity we used the microdrive arrangements within the  
117 systemDrive. For each animal, electrodes aimed at sleep-wake regulatory cell-groups in the  
118 brainstem and/or hypothalamus were first advanced after the recovery period.

119 During this and subsequent driving sessions, the animal was maintained under anesthesia with  
120 0.5%-2% isoflurane gas and the head-mount was opened to access the systemDrive. We  
121 maintained the recordings throughout the driving session. Each electrode bundle was advanced  
122 incrementally (about 25 $\mu$ m) and the signal was monitored until we observed new single-unit  
123 activity. For electrode trajectories that passed through the superior and inferior colliculi or other  
124 sensory-responsive regions, we tested auditory and visual stimuli to evoke responses that would  
125 confirm that the electrode was advancing through the appropriate brain structures.

## 126 **Data Analysis:**

127 All analyses were performed using custom-written MATLAB (Mathworks) and Labview (National  
128 Instruments) scripts.

129 **Sleep and Behavioral Scoring:**

130 Hippocampal LFP, ECoG, and accelerometer time-series were down-sampled to 1000 samples  
131 per second and reformatted into 1 hour-long blocks of binary data within a custom Labview script.  
132 The raw data were then band-pass filtered at 1-125 Hz for LFP, 1-55 Hz for ECoG, and 2-100 Hz  
133 for head acceleration.

134 SOV was marked using an adaptation of the semi-automatic Linear Discriminant Analysis (LDA)  
135 within custom-written Labview scripts previously described<sup>31,33</sup>. The SOV was initially classified  
136 into four main states: Non-rapid eye movement (NREM) sleep, rapid eye movement (REM) sleep,  
137 awake ( $wake_{wb}$ ), and active exploration with non-coherent theta rhythm ( $wake_{\theta}$ ). For each animal,  
138 4-6 hours of video-EEG data within 1 day were randomly selected and manually scored for SOV  
139 and SOV transition time. These data were then used to train the LDA. The remaining 18-20 hours  
140 of data were set aside as out-of-sample data (test set). For both training and test sets, features  
141 were computed, within 2 second long windows, from EEG spectral power in frequency bands 0.5-  
142 4, 4-8, 8-12, 12-25, and 25-80 Hz, plus coherence measurements and head acceleration. The  
143 features were generated using causal filters and updated every second at the end of computation  
144 window. Therefore, all the scores are based on information up to the time leading to the state  
145 transition and *not* after that.

146 We further introduced Bayesian probabilities for each state given its previous state. For example,  
147 REM normally occurs after NREM. Exceptions to this are in Narcolepsy and sleep deprivation<sup>34</sup>.  
148 We verified the performance of the classifier for out-of-sample test data and used the classified  
149 SOV as the new training set to recursively update the parameters of the LDA.

150 Head acceleration and EEG spectral power have been widely used to distinguish between  
151 discrete states of NREM, REM,  $wake_{wb}$ , and  $wake_{\theta}$ . For instance, changes in theta to delta power  
152 ratio is commonly used to mark transitions between NREM and REM. As the animal transitions  
153 from NREM to REM the decrease in delta power and appearance of theta power will increase the

154  $\frac{\theta}{\delta}$  ratio. Theta rhythm is also expressed during exploratory wake bouts, which are at times  
155 associated with small movement marked by exploratory whisking. Wake<sub>θ</sub> bouts could be  
156 mislabeled by the  $\frac{\theta}{\delta}$  ratio. However, the theta rhythm in the REM state is much more spatially  
157 coherent than in wake<sub>θ</sub>. Therefore we used temporal coherence in one hippocampal channel and  
158 spatial coherence between hippocampal channels of the theta band to further distinguish REM  
159 bouts. After identification of the intermediate state (IS) (see Results) we updated the process for  
160 the LDA-based automatic sleep-scoring to include IS based on the same features.

### 161 **Spike Scoring:**

162 We used Intan Technologies differential (RHD2216) and referential (RHD2132) preamplifiers to  
163 acquire electrophysiological signals. The default pass-band for the filters in these preamplifiers is  
164 between 0.1 Hz and 7.5 kHz. A 16-bit analog to digital converter then samples the signal from the  
165 AC-coupled amplifiers. At 7.5 kHz, the cut-off frequency in the analog low-pass filter is much  
166 higher than what is used conventionally (e.g. 3.5 kHz in <sup>12,23</sup>).

167 Data segments were filtered with a causal band-pass filter with 250 Hz to 7.5 kHz pass-band, and  
168 then thresholded to detect single-unit activity. Units were detected as instances of threshold  
169 crossings where thresholds were specified as multiples of the standard deviation of the filtered  
170 background signals. The background signals represent separate epochs of time that are free of  
171 distinguishable spiking activity and are used to calculate the mean and variance of the  
172 background distribution. We detected units with a threshold of 5-7 standard deviations. When  
173 spike events were detected, the waveform of each action potential was extracted from the data.

### 174 **Statistical Analysis:**

175 The core analysis of this work is to characterize the state-dependent firing rate for each neuron,  
176 and determine the times with respect to observed state transitions, when the neuron changes  
177 firing rate from its pre-transition baseline firing rate.

178 We adopted the Poisson process statistics for calculations of the instantaneous firing rate and  
179 statistical comparisons to determine the time point at which a significant change in firing rate  
180 happens ( $t_{\text{sig}}$ ):

$$181 \quad P_{\lambda}(k) = \frac{\lambda^k e^{-\lambda}}{k!}, \quad \lambda = FR \times N \times \tau$$

182 Where  $FR$  is the instantaneous state-dependent firing rate,  $N$  is the number of trials,  $\tau$  is the bin  
183 size, and  $\lambda$  is the mean state-dependent firing rate. The “trials” here are relevant state transitions,  
184 i.e. firing rate of a PPT REM-active neuron during IS to REM transitions (Fig. S1).

185 For each neuron and each identified state transition (e.g. NREM to REM), the pre-transition mean  
186 firing rates ( $\lambda$ ) over many trials (e.g. NREM bouts) form the reference Poisson distribution. We  
187 then used the cumulative distribution function with 1%-99% confidence intervals to find the post-  
188 transition instantaneous firing rate outside of the confidence bounds. The time point associated  
189 with the significantly different instantaneous firing rate was then determined as  $t_{\text{sig}}$ .

190 During the course of our experiments, the activity of each neuron at each target location was  
191 measured over many sleep-wake cycles ( $n = 100-300$ ). The large ensemble of “trials” enables us  
192 to have sub-second resolution (bin size) in our statistical analysis, which is crucial for causality  
193 determination.

## 194 **Results**

195 We successfully acquired simultaneous measurements from up to four separate sleep-wake  
196 regulatory nuclei (SWRN) in each rat. The success rates of chronic systemDrive targeting and  
197 recording from multiple ( $n = 12$ ) rats are shown in Table S1. Each target was categorized by  
198 whether the electrode tracks reached the target SWRN, and whether unit activity characteristic of  
199 those nuclei were recorded. Cumulative recording duration, number of recording sessions, and  
200 number of single units exceeding a threshold of 7 standard deviations are presented for each



201 animal. The extended 3-10 day recording sessions generally began when the electrodes were  
202 estimated to be in their target structures. Each successive recording session had at least one of  
203 the electrode bundles at a new ventral location within the targets.

204 **A distinct intermediate state exists between non-rapid eye movement sleep and**  
205 **rapid eye movement sleep**

206 A transitional stage prior to REM was first described by Gottesmann<sup>35</sup> in Wistar rats. They found  
207 that REM was often preceded by simultaneous high-amplitude cortical spindles – EEG sign of  
208 NREM – and hippocampal theta activity – EEG sign of REM. The group later characterized the  
209 transitional stage using multi-unit recordings from the pontine reticular formation and a distribution  
210 of cortical and hippocampal electrodes, and coined the name “Intermediate State”<sup>36,37</sup>.

211 We observed the intermediate state (IS) in our measurements and identified it as a spectrally  
212 distinct extended state that often occurred at the end of NREM. The time and frequency features  
213 of IS during a NREM to REM transition are illustrated in Fig. 1. NREM is associated with slow (1-  
214 4 Hz), large amplitude cortical oscillations (red panel in Fig. 1A). In contrast, REM is characterized  
215 by rhythmic theta (5-8 Hz) in both hippocampus and cortex (green panel in Fig. 1A). IS onset is  
216 defined by appearance of weak bursts of theta-band activity in the presence of identifiable,  
217 although weaker than in NREM, delta band activity. IS termination is defined by a large reduction  
218 of power in the slower delta band and a sharp increase in the theta band power, often indicating  
219 the onset of REM. During the IS (onset and offset marked by magenta lines in Fig. 1A), the head  
220 acceleration power is low with no evidence of the short spikes characteristic of muscle twitches  
221 during REM. Unlike NREM and REM states that have clear spectral peaks in the delta and theta  
222 bands, the IS simultaneously exhibits broader power peaks covering delta and higher theta  
223 frequencies (Fig. 1B). Further, the theta oscillations during IS are both temporally and spatially  
224 incoherent.

225 To visualize moment-to-moment transitions in sleep-wake states, we used the canonical  
226 discriminant space of the LDA. Because points in the LDA space represent brain activity at  
227 different times, we can link the consecutive points to illustrate trajectories. These trajectories  
228 passing through different clusters then represent transitions between states. The 2-D projection  
229 of the full canonical space onto the first two canonical discriminant coordinates is shown in  
230 Fig. 1C. We calculated the iso-probability contours in the 2-D space and used them to mark the  
231 boundaries of each state. The onset and offset of trajectories that describe transitions through  
232 states were then marked as crossings of the boundaries. Overlaid on the clusters in Fig. 1C are  
233 representative trajectories between NREM and wake as well as NREM and REM. We found that  
234 within the 2-D LDA space, an overwhelming number of trajectories from NREM to REM and  
235 NREM to wake appear to dwell and pass through the well-defined cluster corresponding to the  
236 IS.

237 Once we quantified the transition probabilities for all possible state transitions (Fig. 1D), we found  
238 that in all transitions out of NREM, 40% merged into IS. Further, 80% of the transitions out of IS  
239 merged into REM, while the remaining 20% transitioned to the wake state.

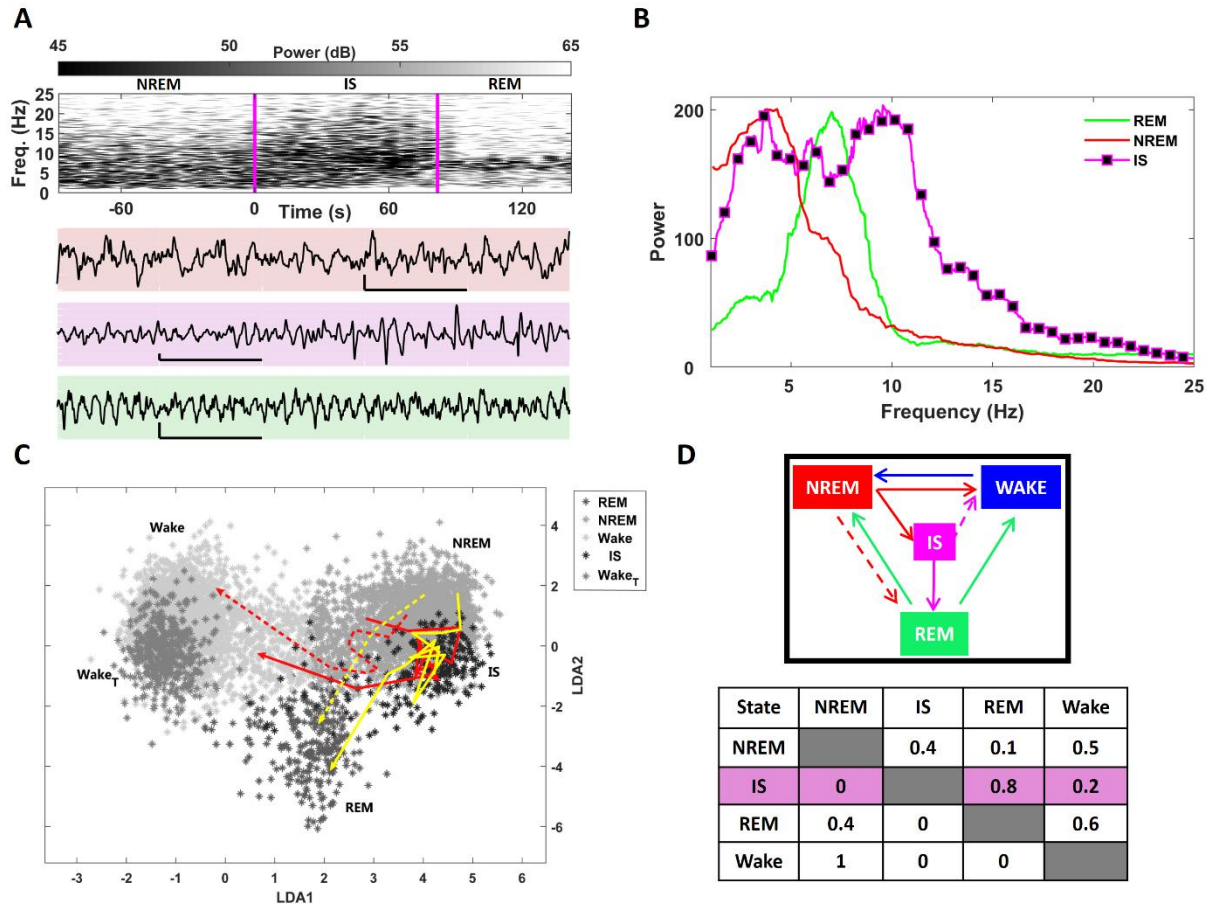

240  
 241 **Figure 1. Time-frequency characteristics of the intermediate state (IS).** (A) Hippocampal LFP  
 242 recording illustrating spectral power fluctuations during NREM to IS to REM transitions. As the  
 243 brain exits NREM, spectral power increases in the theta range simultaneous with persisting  
 244 power in the delta range. The REM onset is then marked by a striking increase of coherent activity  
 245 in the theta range. The IS onset and end are marked by solid magenta lines. All vertical and  
 246 horizontal scale bars are 100 mV and 1 second; respectively. Power is calculated over 8 second  
 247 windows with 4 second overlap and normalized to 0.001 as base-power. (B) The simultaneous  
 248 delta and theta activity in the IS is highlighted in the power plot averaged over 20 second long  
 249 time-series for each state. Power is calculated from the hippocampal LFP recording channel as in  
 250 A with overlapping 2 s long windows. (C) Scatter plot of the first two linear canonical  
 251 discriminants highlight the five groups: NREM, REM, IS, Wake, or Wake<sub>T</sub> (wake<sub>theta</sub>). We define  
 252 the transitions between states as trajectories connecting the clusters in the canonical space.  
 253 Typical direct trajectories from NREM to REM and NREM to Wake are illustrated in dashed yellow

254 and red arrow-lines. Most transitions from NREM to REM pass through the IS region (solid yellow  
255 line). A few transitions from NREM to Wake pass through the IS region (solid red line). **(D)** The  
256 transition probabilities between possible SOVs. Because majority of transitions from NREM to  
257 REM pass the IS region, direct transitions are marked by a red dashed line.

258

## 259 **Characterization of the intermediate state during light/dark cycle**

260 In diurnal animals, such as rats, most of the light period is spent in fragmented sleep with few  
261 wake bouts and most of the dark period is spent in fragmented wake with few sleep bouts. The  
262 mean and standard deviations of hourly fractions spent in each SOV, including the IS, pooled  
263 across all 12 animals used in this study are shown in Fig. 2A. Green denotes REM, magenta  
264 denotes IS, red denotes NREM, and blue denotes wake. The light/dark (L/D) cycle is shown by  
265 color, where yellow indicates light and gray indicates dark periods.

266 Collectively, wake accounts for 45 to 55% of the time. NREM accounts for majority of time in  
267 sleep, corresponding to 35 to 40% of the day. REM sleep occurs for the small fraction of 5-10%  
268 of the day. These patterns all display clear diurnal variations. The IS, regardless of its next state  
269 (either wake or REM), accounts for ~2-4% of the time during the dark period and ~2-6% of the  
270 time during the light period (Fig. 2C). As shown in Fig. 2B, regardless of the time of day (TOD),  
271 IS lasts sufficiently to be detectable with our sleep-scoring algorithm.

272 Only 20% of the transitions out of IS merged into the wake state. We investigated whether the IS  
273 epochs that merged into wakefulness are different from the ones that transitioned to REM. We  
274 found that the duration of IS prior to wake is on average higher than the duration of IS prior to  
275 REM. We used survival analysis to investigate whether the duration of IS bouts could be used to  
276 distinguish bouts that transition to REM from bouts that transition to wake. Within our experiments,  
277 failure is defined as a transition out of IS, into either REM or Wake. In contrast, we define survival  
278 as remaining in IS. IS bouts pooled across all 12 animals were scored for duration and marked  
279 as either IS to REM or IS to wake. We then calculated the survival, failure, and cumulative  
280 incidence functions as well as the hazard rates for both groups. The hazard rates,  $\lambda_{IS, \text{Transition Type}}$ ,  
281 for IS to REM and IS to wake transitions are shown in Fig. 2D. The hazard functions have different  
282 scales, with  $\lambda_{IS, \text{wake}}$  on average 4 times higher than  $\lambda_{IS, \text{REM}}$ . This 4:1 ratio is consistent with the  
283 post-IS SOV distribution in the dataset. The shape of the hazard functions for the IS to REM and

284 IS to wake groups are also different. The  $\lambda_{IS, REM}$  first grows and then quickly decays at 70 s. The  
 285 IS bouts longer than 70 s all transition to wake. The  $\lambda_{IS, wake}$  remains comparatively flat with a small  
 286 peak at a longer IS duration of 80 seconds which corresponds to the maximum IS duration we  
 287 found in the dataset.

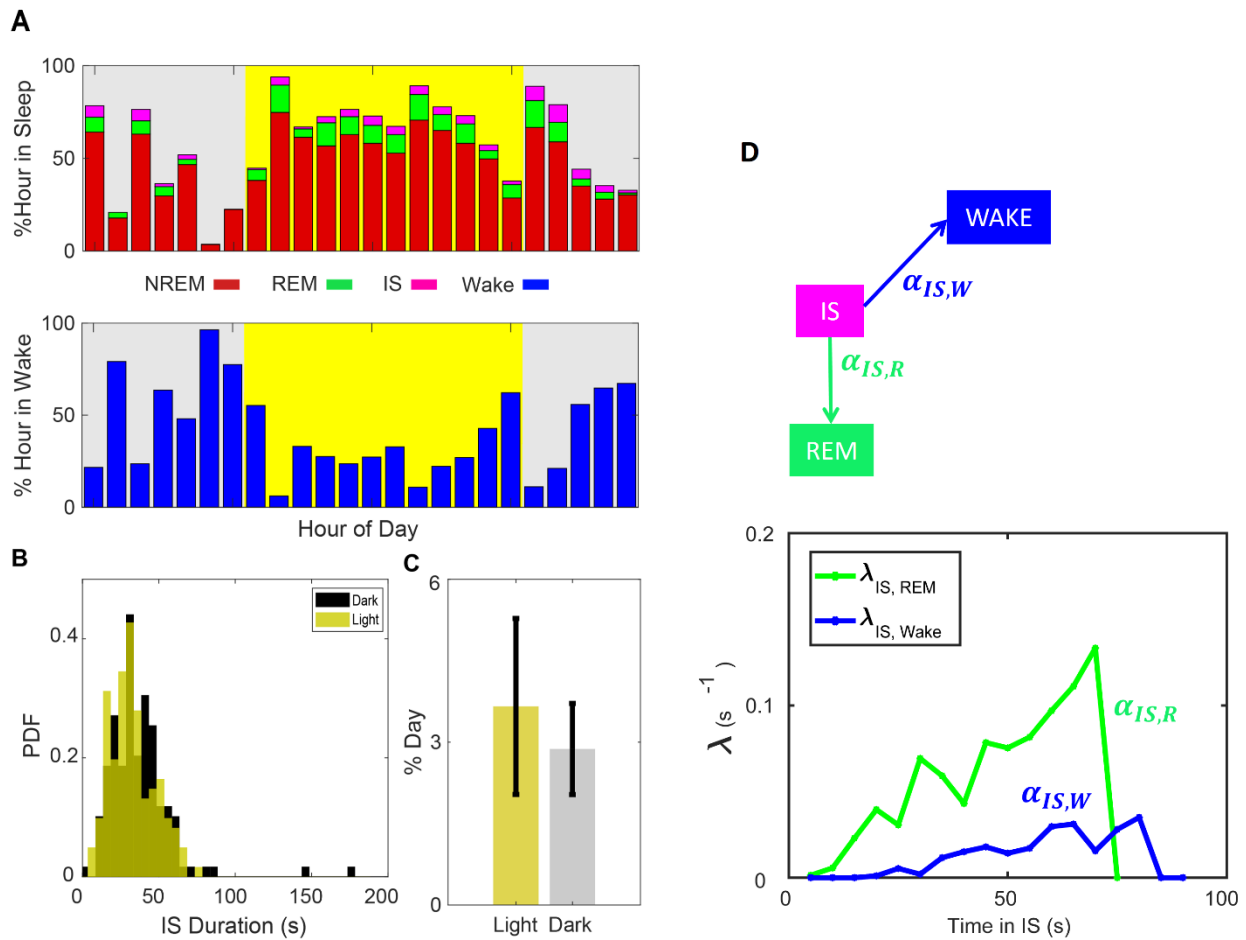

288 **Figure 2. IS patterns and duration across the light/dark cycle. (A)** Hourly percentages spent in  
 289 NREM (red), IS (magenta), REM (green), and Wake (blue) are shown for all the recorded rats.  
 290 Most of the light period (background yellow) is spent in sleep and most of the dark period  
 291 (background gray) is spent in Wake. **(B)** Distribution of the duration of the IS pooled from all  
 292 animals during both light and dark periods. Regardless of the time of day, the intermediate state  
 293 lasts for a considerable amount of time that should be detectable in the current sleep-scoring  
 294 algorithms. **(C)** Mean and standard deviation of percent of time spent in IS for light and dark  
 295 period. **(D)** IS bouts pooled across all rats (n=13) were scored as either IS → REM or IS → Wake.

297 Hazard rates were calculated using competing groups. Competing groups analysis assumes one  
298 event precludes the other.  $\lambda_{IS, REM}$  is on average 4 times larger than  $\lambda_{IS, wake}$ . This ratio indicates  
299 the relative frequency of REM and Wake transition types in the data set. The  $\lambda_{IS, REM}$  first grows  
300 and then quickly decays, with peaks at IS duration of 30 and 70 seconds.  $\lambda_{IS, wake}$  remains  
301 comparatively flat with a small peak at 80.

302

303 **Mean state-dependent neuronal firing rate of the brainstem-hypothalamic SWRN**

304 Our experiments here were motivated by the brainstem-hypothalamic mechanism of sleep-wake  
305 regulation. In this model interactions between cholinergic PPT/LDT, monoaminergic LC/DR, and  
306 GABAergic VLPO lead to different SOVs. Cumulatively, we recorded 855 single units across  
307 multiple regions and many continuous days (3-10 days) from 12 freely behaving animals all in  
308 their home-cage environment. A range of 100-300 complete sleep cycles were recorded from  
309 each neuron. Half ( $n = 428$ ) of the identified single-units recorded were SOV-dependent: 170 were  
310 REM-active, 15 were NREM active, 142 were wake-active, 60 were wake and REM active, and  
311 41 were active in all SOVs except REM (denoted as REM-off). These neurons were distributed  
312 throughout multiple brain regions: We found Wake-active neurons in PPT, LDT, and DR; NREM-  
313 active neurons in VLPO; REM-active neurons in PPT, LDT, and in lateral hypothalamus adjacent  
314 to VLPO. We also identified a group of REM-off neurons located in vIPAG.

315 The mean firing rate of each identified SOV-dependent neuron during each SOV is shown in  
316 Fig. 3A. The firing rates for each neuronal group, during different SOVs, are separated based on  
317 light (orange dots) and dark cycles (blue dots). For each neuronal group the firing rates are  
318 normalized to the maximum firing rate of the group over all SOVs ( $M_{FR}$ ) shown in black dots. The  
319 neuronal groups are separated by neuron type, as defined by a combination of anatomical  
320 location, SOV-dependence, and the waveform pattern of the extracellular action potential.  
321 Representative average waveforms by type are shown in Fig. 3B.

322 We found that the maximum firing rates of neurons in each neuronal group within each state  
323 formed substantially low variance distributions and were highly consistent across states. This  
324 indicates a level of homogeneity in state-dependent firing rate for each neuronal group. Further,  
325 the mean and maximum state-dependent firing rates for each neuronal group (Fig. 3A) were  
326 consistent with previous reports of state-dependent neuronal activity in different cell groups of the



327 sleep-wake regulatory network<sup>12,21,23,28</sup>. We therefore interpret this set of data as an ensemble  
328 representative of the dynamics of these cell-group activities.

329 Out of the represented neuronal groups, VLPO is one of the most challenging structures for  
330 continuous stable recordings. This explains the dearth of reports of continuous electrode  
331 recordings, and the fact that such recordings, when available, are performed in short bouts or  
332 when the animal's movements are restricted<sup>28</sup>. To our knowledge, we are the first to report  
333 consistent multi-day observations of VLPO neuronal activity that enabled calculations of mean  
334 state-dependent firing rates during NREM.

335 The mean state-dependent firing rate of a subset of neuronal groups was slightly different during  
336 light versus dark periods. These included the wake-REM active neurons of PPT and LDT and the  
337 REM-off neurons of vIPAG. However, for most of the groups we did not find a consistent circadian  
338 difference in mean state-dependent firing rates.

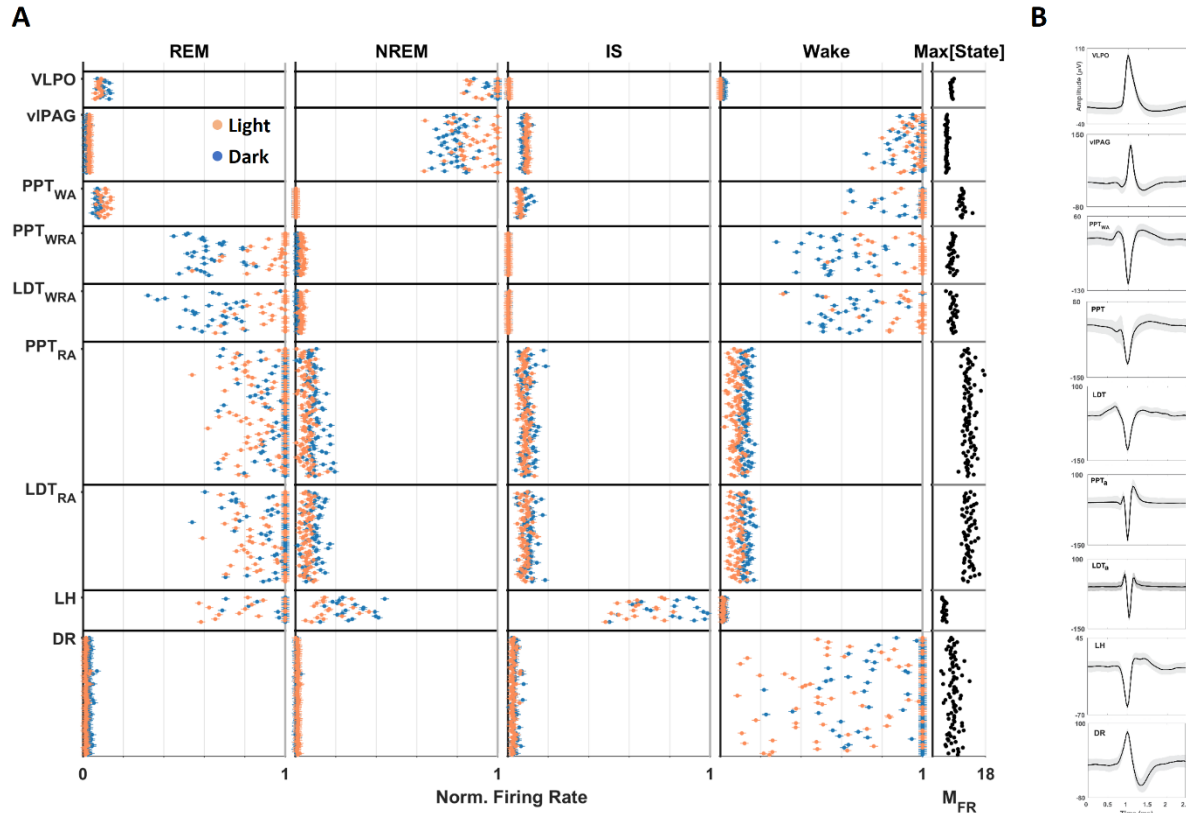

339

340 **Figure 3. Mean and standard deviation of the firing rates of all recorded neurons in brainstem-**

341 **hypothalamic sleep-wake regulatory network. (A)** Firing rates of state-dependent neurons

342 whose recording sites were histologically confirmed pooled from all recording days across all

343 animals. The firing rate of each neuron is marked by orange for the light period and blue for the

344 dark period. For each neuron the firing rate is normalized to the maximum firing rate of that

345 neuron across all states of vigilance. The maximum firing rate for each neuron is illustrated on

346 the right by black dots in the Max[State] column. In PPT and LDT we found a variety of neurons

347 that were REM-active (RA), Wake and REM active (WRA), or Wake active (WA). The neurons are

348 separated here based on their location and activity dependence. The average state-dependent

349 firing rates appear to be extremely consistent across all neurons and states. **(B)** Representative

350 average waveforms for all neuronal groups.

351 VLPO, ventrolateral preoptical area; vIPAG, ventrolateral periaqueductal gray; PPT,

352 pedunclopontine tegmentum; LDT, laterodorsal tegmentum; LH, lateral hypothalamus; DR,

353 dorsal raphe.

354 **Neurons in lateral hypothalamus are active during IS**

355 As shown in Fig. 3A, none of the identified state-dependent neurons active during NREM, REM,  
356 or wake states were active during the IS. However, we identified a group of IS-active neurons in  
357 the lateral preoptic area (Fig. S2A). Based on their activity profile (Fig. S2B), spike waveform (Fig.  
358 S2C), and ventral location, these neurons might be the GABAergic melatonin concentrating  
359 hormone (MCH) neurons distributed in lateral hypothalamus that were formerly identified as REM-  
360 active neurons<sup>24,38–40</sup>.

361 As shown in Fig. S2B these neurons have high discharge rates during REM as well as IS bouts  
362 and are almost silent during NREM and wake. EEG activity in the theta band is a mutual feature  
363 of both IS and REM states. This might imply that the IS-active neurons of LH are linked to theta  
364 band activity rather than a specific SOV. However, we found that the discharge rate of these  
365 neurons was remarkably low during active exploration (Wake<sub>θ</sub>) bouts which are associated with  
366 theta band activity in EEG. The IS can therefore be characterized as a distinct SOV with clear  
367 EEG and behavioral signs as well as corresponding neuronal activity.

368 We found no significant difference between average discharge rate of these neurons during IS  
369 bouts prior to Wake versus the IS bouts prior to REM.

370 **Investigation of causality of neuronal activity in emergence of cortical signs of SOV**

371 We aimed to investigate the role of brainstem and hypothalamic neurons in the emergence of  
372 SOVs and transitions between them. By analyzing the temporal relationship between  
373 spontaneous neuronal activity and state transitions in freely behaving animals, we can clarify the  
374 role of any given cell-group in initiating or maintaining a SOV. The question is whether the activity  
375 of any given neuron precedes or follows the SOV transitions.

376 The SOV and state transition times, as described in the methods, were defined from the  
377 hippocampal, cortical, and behavioral signs of the state<sup>7</sup> using causal spectral features of the  
378 hippocampal LFP, ECoG, and head acceleration. These features were updated every second at

379 the end of the computation window, hence allowing for almost instantaneous determination of  
380 SOV. This contrasts sharply with conventional methods of sleep-scoring with non-overlapping  
381 windows of fixed length (e.g. 4 s in mice, 10 s in rats) that are attributed a score for the full length  
382 of the window rather than the state onset.

383 Neuronal firing rates over many sleep cycles (~100-300) were derived from simultaneous  
384 measurements of single-unit activity from a subset of the SWRN. For each SOV transition (from  
385 state A to B), we collected the distribution of firing rates while in state A. The firing rate was  
386 calculated from spike-times separated from state transitions by at least (3 seconds)). The  
387 transition time ( $t_{\text{trans}}$ ) was defined as the time when EEG and behavioral signs of state B first  
388 emerged. Following the Poisson process statistics (see Methods) we determined the time-point  
389 that the instantaneous state-conditioned firing rate during state B differed significantly from the  
390 firing rate in state A. The time-point is denoted as  $t_{\text{sig}}$ . The large ensemble of firing rates for each  
391 neuron during each transition (sleep-wake cycles = 100-300) allows for sub-second resolution  
392 determination of  $t_{\text{sig}}$ .

393 If the significant change in the state-conditioned firing rate occurred prior to transition time  
394  $t_{\text{sig}} < t_{\text{trans}}$ , then it is counted as negative  $t_{\text{sig}}$ . Positive  $t_{\text{sig}}$  indicates that the state-conditioned firing  
395 rate changed after transition time,  $t_{\text{sig}} > t_{\text{trans}}$ . A positive  $t_{\text{sig}}$  implies that the changes in firing of that  
396 neuron type cannot be causal for the state transition.

397 The  $t_{\text{sig}}$  values for the 428 identified state-dependent neurons are marked by blue dots in Fig. 4.  
398 The gray shading indicates the positive  $t_{\text{sig}}$  and therefore non-causal relationships. The white  
399 shading indicates the negative  $t_{\text{sig}}$  where the change in firing rate occurred prior to state transition.  
400 For each cell group and state transition, dashed gray lines indicate the representative average  
401 state-dependent firing rate as a function of time during state transitions. We found that the  $t_{\text{sig}}$   
402 values for individual cells are tightly distributed within each cell group for each state transition.  
403 This indicates the consistency of neuronal activity during state transitions.

404 Cell groups whose mean firing rates increase during state transitions (e.g. REM-active PPT or  
405 LDT neurons during NREM to REM transitions) can either turn on to cause the state ( $t_{\text{sig}} < 0$ , white  
406 shading in Fig. 4), which means high discharge rates prior to emergence of cortical signs of a  
407 SOV, or can be turned on as a consequence of state transition ( $t_{\text{sig}} > 0$ , gray shading in Fig. 4).  
408 Among all cell groups with increasing firing rate during state transitions, only NREM-active  
409 neurons of VLPO and REM-off neurons of vIPAG during REM to NREM transitions had negative  
410  $t_{\text{sig}}$ . The discharge rate of all other neurons increases *after* the appearance of EEG and behavioral  
411 signs of SOV. Therefore, the increase in their discharge rate does not mean that they are causing  
412 the state change, only that their behavior is a consequence of the state change.

413 Likewise, cell groups whose mean firing rate decreases during state transitions (e.g. wake-active  
414 DR neurons during wake to NREM transitions) can either be responsible for the emergence of  
415 the state ( $t_{\text{sig}} < 0$ , white shading in Fig. 4), or be inhibited as a consequence of the state ( $t_{\text{sig}} > 0$ ,  
416 gray shading in Fig. 4). We found that all the cell groups that decreased their firing rates during  
417 state transitions did so prior to transition time ( $t_{\text{sig}} < 0$ ), which could allow a new SOV to emerge.  
418 Whether this pattern is internally sourced by the cell groups or by an external signal remains  
419 unknown.

420 The NREM-active neurons of VLPO are the only population with negative  $t_{\text{sig}}$  values during all  
421 state transitions. Specifically, during transitions into NREM the activity of the VLPO neurons  
422 increases significantly with respect to the state-conditioned average firing rate prior to the state  
423 transition. These neurons also decrease their firing rate significantly prior to transitions out of  
424 NREM. Therefore, the causality hypothesis<sup>4,8</sup> holds for the NREM-active neurons of VLPO.

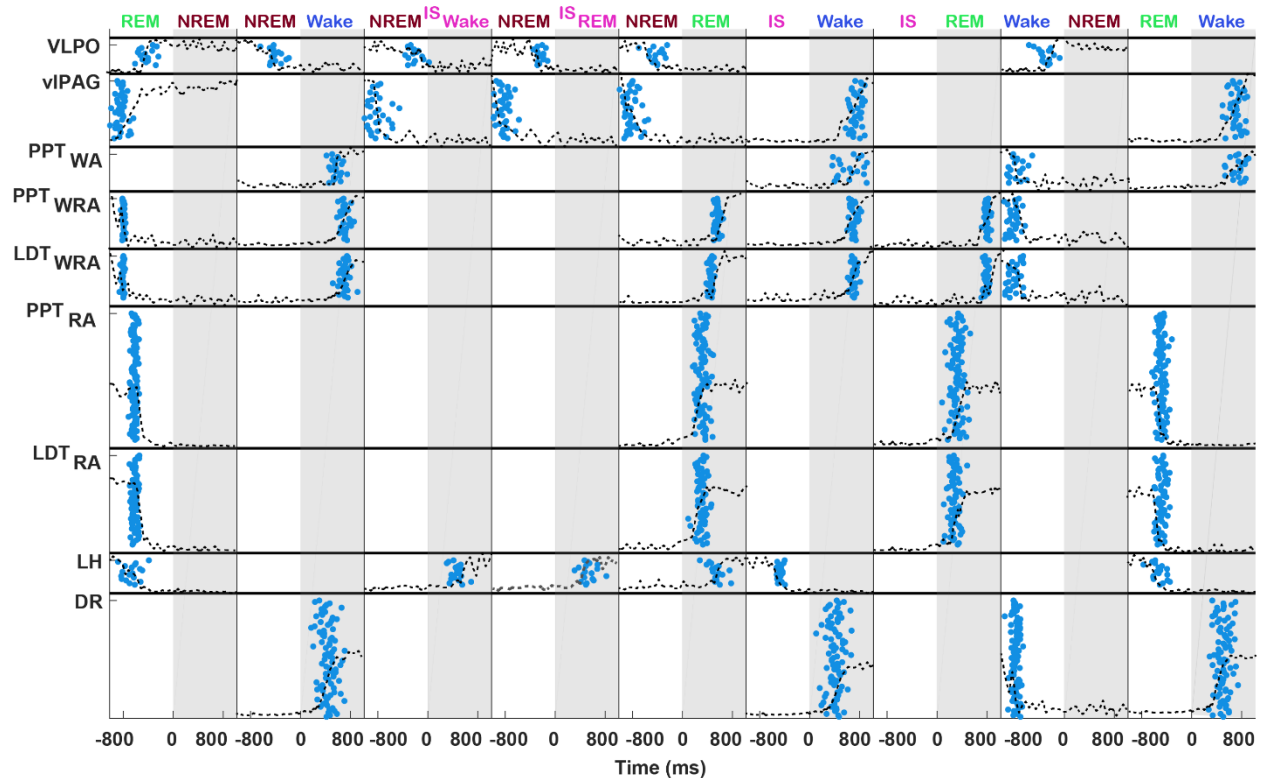

425

426 **Figure 4. The  $t_{sig}$  for all neurons with respect to cortically defined state transitions.** Each column  
427 indicates a state transition, where the transition is marked by time zero. The state before and  
428 after the transitions are marked by the white and gray backgrounds, respectively. The  $t_{sig}$  for  
429 each neuron is indicated by a blue dot. Representative average firing rates during transition are  
430 shown by the dashed gray lines. The firing rates for DR, PPT/LDT<sub>RA</sub>, PPT/LDT<sub>WRA</sub> groups are  
431 normalized to half height of the plot box. Other firing rates are normalized to the full height of  
432 the plot box. Notice that for every neuronal group and transition, the  $t_{sig}$  values are tightly  
433 distributed. This indicates that the activity of these neurons is extremely consistent. The gray  
434 shading indicates the positive  $t_{sig}$  and not causal relationships while the white areas are negative  
435  $t_{sig}$  indicating that the neuron changed its behavior prior to the appearance of cortical signs of a  
436 state.

437 VLPO, ventrolateral preoptical area; vIPAG, ventrolateral periaqueductal gray; PPT,  
438 pedunculo pontine tegmentum; LDT, laterodorsal tegmentum; LH, lateral hypothalamus; DR,  
439 dorsal raphe.

440

441 **NREM-active and REM-active neurons demonstrate distinct dynamics during IS**  
442 Because we found that IS seems to be characteristic of ending of NREM and often precedes  
443 REM, we utilized the  $t_{sig}$  values to investigate the behavior of REM and NREM active neurons  
444 during IS transitions. During NREM to IS transitions, the discharge rates of both the solely NREM-  
445 active neurons of VLPO and the REM-off neurons of vIPAG decreased prior to transition into IS  
446 ( $t_{sig} < 0$ ). The behavior of NREM-active neurons implies a level of causality, but whether the  
447 decrease in firing rate is programmed internally or caused by other factors remains to be  
448 investigated. In contrast, the discharge rate of the REM-active as well as REM and wake active  
449 neurons of PPT and LDT does not change during NREM to IS transitions, i.e. their firing rate  
450 remains just as low during IS as during NREM.

451 We found a population of neurons in lateral hypothalamus that were active during both REM and  
452 IS. These neurons remained active with no substantial change in their firing rate during IS to REM  
453 transitions. During transitions out of REM to NREM or wake, these neurons decreased their firing  
454 rate prior to the transition time ( $t_{sig} < 0$ ). Likewise, the firing rate decreased prior to the transitions  
455 out of IS to wake ( $t_{sig} < 0$ ). We did not find a causal increase in firing rate during NREM to IS  
456 transitions ( $t_{sig} > 0$ ). The increase in firing rate appeared to be following the emergence of IS rather  
457 than causing it.

458 Nonetheless, the activity of the NREM-active neurons during transitions into IS and the activity of  
459 the IS-active LH neurons during the IS indicates that the IS is a distinct state of vigilance rather  
460 than only a transitory dynamic between NREM and REM.

461

462

## 463 **Discussion**

464 We developed a dataset including 569 cumulative days of SOV-scored single- and multi-unit  
465 measurements from multiple cell-groups in the sleep-wake regulatory network (SWRN). These

466 measurements are from 12 freely behaving rodents, with each rat recorded for over 30 day  
467 periods, which consisted of multiple segments of continuous recordings that lasted 3 to 10 days.  
468 To our knowledge this is the most detailed SOV scored dataset of long-term and simultaneous  
469 measurements of single-unit activity from multiple of the brainstem and hypothalamic cell groups;  
470 PPT, LDT, DR, LH, vIPAG, and VLPO in freely behaving rodents.

471 Our dataset complements previous work <sup>4,7,11,20,21,23,25,28,41,42</sup>, but is characterized by several  
472 significant distinctions.

473 First, our simultaneous measurements of hippocampal LFP, ECoG, head acceleration, and  
474 neuronal activity from multiple cell-groups in freely behaving animals represent a novel "systems  
475 neuroscience" attempt aimed at characterizing the dynamics of the brainstem-hypothalamic  
476 SWRN system described by Saper et al. <sup>4,9</sup>. Second, the data include continuous measurements  
477 from NREM-active VLPO neurons over many (100-300) consecutive sleep-cycles without  
478 introduction of any restrictions to affect animal behavior. Third, our approach to sleep scoring  
479 resulted in continuous and temporally precise determination of SOV and SOV transition times.  
480 Fourth, time-resolved analysis of the SOV and SOV transition times as well as acquisition of  
481 sufficient sleep-wake cycles provide suitable statistical power to probe causality between  
482 neuronal firing rates and emergence of cortical signs of states. Finally, we re-discovered the  
483 intermediate state (IS, see <sup>43</sup>) and characterized it as a distinct state that usually follows NREM  
484 and precedes REM. Furthermore, we identified neurons in lateral hypothalamus (LH) that become  
485 active during the IS.

486 Much of the research investigating the neuronal activity of the cell-groups in the SWRN is  
487 performed within conditions that inherently modulate the animals' sleep cycles and/or limit the  
488 time-resolution required for determination of the relationship between firing rate and state  
489 transitions. Almost all sleep studies available today are performed with head-fixed animals, or in  
490 novel environments such as isolation boxes, and provide short recordings of the sleep cycles.



491 While such methods avoid the technical challenges associated with simultaneously recording the  
492 hippocampal, cortical, and behavioral indices of different sleep states as well as state-dependent  
493 neuronal activity, they complicate the analysis of SWRN dynamics.

494 Deviations from normal home-cage environments change the animals' normal behavior and  
495 sleep-wake cycles. Short-term recordings from restricted animals eliminate the effect of  
496 exogenous (light-dark cycles) and endogenous circadian cycles on sleep dynamics. Furthermore,  
497 to detect a statistically significant change in neuronal firing rates during state transitions, with sub-  
498 second temporal resolution, many sleep cycles are required. Finally, conventional SOV scoring  
499 techniques assign a score to non-overlapping time-windows with fixed length and predetermined  
500 boundaries. These fixed windows prevent accurate assessment of the SOV dynamics and  
501 identification of the true onset of a state.

### 502 **Implications of the intermediate state for sleep-wake regulation**

503 Gottesmann was the first to identify an intermediate state in Wistar rats that occurred between  
504 NREM and REM, and which exhibited both cortical spindles (a sign of NREM) and hippocampal  
505 theta rhythm (a sign of REM) <sup>35</sup>. Gottesmann's finding of the IS was also confirmed in other rat  
506 experiments <sup>43-45</sup> and observed in humans by Lairy et al <sup>46</sup>. In humans, the IS was characterized  
507 as a short EEG stage (a few seconds to a few minutes) with spindles and K complexes (signs of  
508 slow wave sleep, stage 2), and low voltage activity without eye movement (sign of paradoxical  
509 sleep) <sup>46</sup>. More recently this state has appeared in a small subset of publications focused on more  
510 accurate sleep-scoring algorithms <sup>47</sup> and sleep irregularities in neurological disorders <sup>48,49</sup>.  
511 However, despite Gottesmann's findings and characterizations of it, the intermediate state has  
512 not been considered a formal state of vigilance.

513 We re-discovered the IS in our animals and found distinct temporal, spectral, and neuronal  
514 patterns associated with it that identify it as a formal SOV. The IS lasts for a considerable amount  
515 of time (median duration = 35 s, Fig. 2B) that should be detectable in current sleep-scoring

516 algorithms. The spectral features of the IS are distinct from both NREM and REM and although  
517 IS often follows NREM, we never observed transitions from IS back to NREM. Therefore, IS  
518 cannot be categorized as short fluctuations of cortical activity during transitions out of NREM.  
519 Moreover, we found specific neurons in LH that are active during IS while other REM- or NREM-  
520 active neurons are off during the state. We, therefore, identify the IS as a distinct state of vigilance.  
521 The conventional/routine sleep-scoring analyses assume state transitions are discrete and easily  
522 classified by fast changes in EEG features, and in behavioral and physiological activity  
523 represented by EMG power, head acceleration, heart rate, and/or breathing. The states are often  
524 identified as NREM, REM, and Wake (both active exploratory wake and quiet wake)<sup>9</sup>. Therefore,  
525 research has focused on identifying brain regions involved in triggering discrete transitions  
526 between these states. However, the emergence of relatively enduring (35 s on average) EEG  
527 spectral characteristics that combine and expand upon the features of both NREM and REM in  
528 the transition from NREM to REM or to wakefulness indicates that conclusions regarding the  
529 mechanisms underlying the onset of any SOV must be revisited.

530 The technical challenges in measuring from a number of SWRN nuclei indicate the value of  
531 SWRN mathematical models (see for example <sup>16,17</sup>) for understanding the underlying mechanisms  
532 of sleep-wake regulation. However, the models and the experiments they are based on have  
533 generally not considered the existence of the IS or the unique sets of IS-active neurons.  
534 Implementation of the IS as a distinct SOV with its own state-active neurons will enable the models  
535 to provide mechanistic insight into differentiation between transitions to Wake versus transitions  
536 to REM.

537 The IS-active neurons in lateral hypothalamus remained active during IS to REM transitions.  
538 However, these neurons turned off prior to transitions out of IS and into wake. Therefore, we  
539 hypothesize that the activity of these LH neurons determines whether transitions out of IS  
540 progress into REM or wake. Lateral hypothalamus and basal forebrain have been recently

541 implicated in sleep-wake regulation <sup>5,39</sup>, and these neurons and their activity profile motivate  
542 further probing of that circuit.

### 543 **Implications of correlative vs. causal activity in the brainstem-hypothalamic SWRN**

544 We used time-resolved transition-based analysis to probe the causality of the SWRN dynamics  
545 in transitions between states of vigilance. With the exception of NREM-active VLPO neurons,  
546 increases in state-conditioned mean firing rate always followed the emergence of the state which  
547 is determined from cortical and behavioral signs. An increase in neuronal activity that follows the  
548 SOV cannot be programming it.

549 Datta et al. <sup>12</sup> investigated the role of cholinergic PPT neurons in REM regulation. They scored  
550 states of vigilance in 10 s epochs and used a combination of muscle atonia, rapid eye movement,  
551 and hippocampal theta waves to mark REM state. They found that 9 out of 70 PPT neurons  
552 recorded exhibited high firing rates during REM. Previously it had been shown that PPT lesions  
553 result in immediate reduction of REM <sup>9</sup>. Datta et al. concluded that PPT neurons are involved in  
554 both the induction and the maintenance of REM from NREM sleep and are a precursor to the  
555 signs of REM <sup>7</sup>.

556 In agreement with Datta et al. observations, we observed that PPT activity increases during REM.  
557 However, we observed increased PPT activity only *after* emergence of cortical signs of REM and  
558 not prior to it. This questions the hypothesized role of cholinergic REM-on PPT neurons in REM  
559 induction. We suspect that this mismatch is due to two factors. First, the spectral and temporal  
560 features used in our sleep-scoring are generated via causal filters and updated every second at  
561 the end of computation window. Therefore, all the scores are based on information up to the time  
562 leading to the state transition and *not* after that. This is in contrast to fixed length windows used  
563 in conventional sleep-scoring that are susceptible to missing the correct transition time. Second,  
564 for each neuron we collected a large ensemble of firing rates computed over many sleep-wake

565 cycles. The large sample size enables sub-second resolution in determining transition-based  
566 changes in firing rate (see Methods).

567 We observed a similar behavior for other identified SWRN nuclei. Neurons in REM-active LDT,  
568 Wake/REM-active PPT and LDT, Wake-active DR, Wake-active PPT, and REM-off vIPAG cell  
569 groups all show a significant change in their firing rate only *after* their corresponding state  
570 transitions.

571 The cell groups involved in sleep-wake regulation are functionally and spatially heterogeneous  
572 and extend across large neural territories. The presence of such a large number of variable cell  
573 groups that are implicated in the control of the brain's arousal state poses questions on how they  
574 interact to govern rapid ultradian transitions within a sleep cycle (i.e. NREM to REM) as well as  
575 much slower homeostatic and circadian processes. While acute disruptions of the interactions  
576 within the SWRN via antagonist injections or optogenetic inhibition cause acute loss of the  
577 corresponding SOV, chronic ablation of the basal forebrain cholinergic neurons<sup>50</sup>, the  
578 tuberomammillary histaminergic neurons<sup>51</sup>, the LC and pontine cholinergic neurons<sup>26,52,53</sup>, or  
579 combinations of these structures<sup>54</sup> have minimal effects on the regulation of that SOV.

580 Further, almost all of the SWRN brain regions contain intermingled cell types that are active during  
581 more than one SOV. For example in the basal forebrain, glutamatergic, cholinergic, and  
582 parvalbumin (PV)-expressing GABAergic neurons are shown to be active during both REM and  
583 wake, but their optogenetic activation promotes only wakefulness<sup>5</sup>. This raises the question as  
584 to which cell group is involved in maintaining a state rather than specifically initiating the switch  
585 into that state.

586 Logically, a routine based on acute study of stimulus (lesion/optogenetics)-response (i.e. changes  
587 to SOV length and occurrence) dynamics might not be fitting for investigation of a naturally  
588 occurring spontaneous behavior such as sleep-wake transition and cycling. Therefore, although

589 internal/external stimuli might cause transitions into a state, it does not necessarily mean that the  
590 stimulated neurons are causal for the emergence of the state in normal conditions.

591 Our findings indicate that the long-standing flip-flop model of sleep-wake regulation <sup>4</sup> needs  
592 significant revision. Fundamental questions remain about the neural mechanisms that maintain  
593 specific states and the neural interactions that lead to the emergence of new states.

594

## 595 **References**

- 596 1. Moruzzi, G. & Magoun, H. W. Brain stem reticular formation and activation of the EEG.  
597 *Electroencephalogr. Clin. Neurophysiol.* (1949). doi:10.1016/0013-4694(49)90219-9
- 598 2. ECONOMO, C. V. SLEEP AS A PROBLEM OF LOCALIZATION. *J. Nerv. Ment. Dis.* **71**, 249–259  
599 (1930).
- 600 3. Sherin, J. E., Elmquist, J. K., Torrealba, F. & Saper, C. B. Innervation of Histaminergic  
601 Tuberomammillary Neurons by GABAergic and Galaninergic Neurons in the Ventrolateral Preoptic  
602 Nucleus of the Rat. *J. Neurosci.* (2018). doi:10.1523/jneurosci.18-12-04705.1998
- 603 4. Saper, C. B., Fuller, P. M., Pedersen, N. P., Lu, J. & Scammell, T. E. Sleep State Switching.  
604 *Neuron* (2010). doi:10.1016/j.neuron.2010.11.032
- 605 5. Xu, M. *et al.* Basal forebrain circuit for sleep-wake control. *Nat. Neurosci.* **18**, 1641–1647 (2015).
- 606 6. Weber, F. *et al.* Control of REM sleep by ventral medulla GABAergic neurons. *Nature* (2015).  
607 doi:10.1038/nature14979
- 608 7. Datta, S. & MacLean, R. R. Neurobiological mechanisms for the regulation of mammalian sleep–  
609 wake behavior: reinterpretation of historical evidence and inclusion of contemporary cellular and  
610 molecular evidence. *Neurosci. Biobehav. Rev.* **31**, 775–824 (2007).
- 611 8. Saper, C. B., Scammell, T. E. & Lu, J. Hypothalamic regulation of sleep and circadian rhythms.  
612 *Nature* **437**, 1257–1263 (2005).
- 613 9. Saper, C. B., Chou, T. C. & Scammell, T. E. The sleep switch: Hypothalamic control of sleep and  
614 wakefulness. *Trends in Neurosciences* (2001). doi:10.1016/S0166-2236(00)02002-6
- 615 10. Luppi, P.-H. *et al.* Paradoxical (REM) sleep genesis: the switch from an aminergic–cholinergic to a  
616 GABAergic–glutamatergic hypothesis. *J. Physiol.* **100**, 271–283 (2006).
- 617 11. Weber, F. & Dan, Y. Circuit-based interrogation of sleep control. *Nature* (2016).  
618 doi:10.1038/nature19773

- 619 12. Datta, S. & Siwek, D. F. Single cell activity patterns of pedunculo-pontine tegmentum neurons  
620 across the sleep-wake cycle in the freely moving rats. *J. Neurosci. Res.* **70**, 611–621 (2002).
- 621 13. Phillips, A. J. K. & Robinson, P. A. Sleep deprivation in a quantitative physiologically based model  
622 of the ascending arousal system. *J. Theor. Biol.* **255**, 413–423 (2008).
- 623 14. Fulcher, B. D., Phillips, A. J. K. & Robinson, P. A. Modeling the impact of impulsive stimuli on  
624 sleep-wake dynamics. *Phys. Rev. E* **78**, 51920 (2008).
- 625 15. Rempe, M. J., Best, J. & Terman, D. A mathematical model of the sleep/wake cycle. *J. Math. Biol.*  
626 **60**, 615–644 (2010).
- 627 16. Tamakawa, Y., Karashima, A., Koyama, Y., Katayama, N. & Nakao, M. A quartet neural system  
628 model orchestrating sleep and wakefulness mechanisms. *J. Neurophysiol.* **95**, 2055–2069 (2006).
- 629 17. Fleshner, M., Booth, V., Forger, D. B. & Diniz Behn, C. G. Circadian regulation of sleep–wake  
630 behaviour in nocturnal rats requires multiple signals from suprachiasmatic nucleus. *Philos. Trans.*  
631 *R. Soc. A Math. Phys. Eng. Sci.* **369**, 3855–3883 (2011).
- 632 18. Diniz Behn, C. G. & Booth, V. Simulating Microinjection Experiments in a Novel Model of the Rat  
633 Sleep-Wake Regulatory Network. *J. Neurophysiol.* **103**, 1937–1953 (2010).
- 634 19. Lu, J., Sherman, D., Devor, M. & Saper, C. B. A putative flip–flop switch for control of REM sleep.  
635 *Nature* **441**, 589–594 (2006).
- 636 20. Takahashi, K., Kayama, Y., Lin, J. S. & Sakai, K. Locus coeruleus neuronal activity during the  
637 sleep-waking cycle in mice. *Neuroscience* (2010). doi:10.1016/j.neuroscience.2010.06.009
- 638 21. Boucetta, S., Cisse, Y., Mainville, L., Morales, M. & Jones, B. E. Discharge Profiles across the  
639 Sleep-Waking Cycle of Identified Cholinergic, GABAergic, and Glutamatergic Neurons in the  
640 Pontomesencephalic Tegmentum of the Rat. *J. Neurosci.* **34**, 4708–4727 (2014).
- 641 22. Boissard, R. *et al.* The rat ponto-medullary network responsible for paradoxical sleep onset and  
642 maintenance: a combined microinjection and functional neuroanatomical study. *Eur. J. Neurosci.*  
643 **16**, 1959–1973 (2002).

- 644 23. Sakai, K. Sleep-waking discharge profiles of dorsal raphe nucleus neurons in mice. *Neuroscience*  
645 **197**, 200–224 (2011).
- 646 24. Verret, L. *et al.* A role of melanin-concentrating hormone producing neurons in the central  
647 regulation of paradoxical sleep. *BMC Neurosci.* (2003). doi:10.1186/1471-2202-4-19
- 648 25. Aston-Jones, G., Chen, S., Zhu, Y. & Oshinsky, M. L. A neural circuit for circadian regulation of  
649 arousal. *Nat. Neurosci.* **4**, 732–738 (2001).
- 650 26. Lu, J. Identification of Wake-Active Dopaminergic Neurons in the Ventral Periaqueductal Gray  
651 Matter. *J. Neurosci.* (2006). doi:10.1523/jneurosci.2244-05.2006
- 652 27. Bjorness, T. E. *et al.* An Adenosine-Mediated Glial-Neuronal Circuit for Homeostatic Sleep. *J.*  
653 *Neurosci.* **36**, 3709–3721 (2016).
- 654 28. Alam, M. A., Kumar, S., McGinty, D., Alam, M. N. & Szymusiak, R. Neuronal activity in the preoptic  
655 hypothalamus during sleep deprivation and recovery sleep. *J. Neurophysiol.* **111**, 287–299 (2014).
- 656 29. Sigl-Glöckner, J. & Seibt, J. Peeking into the sleeping brain: Using in vivo imaging in rodents to  
657 understand the relationship between sleep and cognition. *Journal of Neuroscience Methods*  
658 (2019). doi:10.1016/j.jneumeth.2018.09.011
- 659 30. Billard, M. W., Bahari, F., Kimbugwe, J., Alloway, K. D. & Gluckman, B. J. The systemDrive: a  
660 Multisite, Multiregion Microdrive with Independent Drive Axis Angling for Chronic Multimodal  
661 Systems Neuroscience Recordings in Freely Behaving Animals. *eneuro* **5**, ENEURO.0261-  
662 18.2018 (2018).
- 663 31. Sunderam, S. *et al.* Improved sleep-wake and behavior discrimination using MEMS  
664 accelerometers. *J. Neurosci. Methods* **163**, 373–383 (2007).
- 665 32. Shanmugasundaram, B. & Gluckman, B. J. Micro-reaction chamber microelectrodes especially for  
666 neural and biointerfaces. (2017).
- 667 33. Sedigh-Sarvestani, M. *et al.* Rapid eye movement sleep and hippocampal theta oscillations  
668 precede seizure onset in the tetanus toxin model of temporal lobe epilepsy. *J. Neurosci.* **34**, 1105–



- 669 14 (2014).
- 670 34. Chemelli, R. M. *et al.* Narcolepsy in orexin Knockout Mice. *Cell* **98**, 437–451 (1999).
- 671 35. Gottesmann, C. Données sur l'activité corticale au cours du sommeil profond chez le rat. *CR Soc.*  
672 *Biol.(Paris)* **158**, 1829–1834 (1964).
- 673 36. Terrier, G. & Gottesmann, C. L. Study of cortical spindles during sleep in the rat. *Brain Res. Bull.*  
674 **3**, 701–6 (1978).
- 675 37. Gandolfo, G., Glin, L. & Gottesmann, C. Study of sleep spindles in the rat: A new improvement.  
676 *Acta Neurobiol. Exp. (Wars)*. (1985).
- 677 38. Jego, S. *et al.* Optogenetic identification of a rapid eye movement sleep modulatory circuit in the  
678 hypothalamus. *Nat. Neurosci.* (2013). doi:10.1038/nn.3522
- 679 39. Tsunematsu, T. *et al.* Optogenetic Manipulation of Activity and Temporally Controlled Cell-Specific  
680 Ablation Reveal a Role for MCH Neurons in Sleep/Wake Regulation. *J. Neurosci.* (2014).  
681 doi:10.1523/jneurosci.5344-13.2014
- 682 40. Apergis-Schoute, J. *et al.* Optogenetic Evidence for Inhibitory Signaling from Orexin to MCH  
683 Neurons via Local Microcircuits. *J. Neurosci.* **35**, 5435–5441 (2015).
- 684 41. Cox, J., Pinto, L. & Dan, Y. Calcium imaging of sleep–wake related neuronal activity in the dorsal  
685 pons. *Nat. Commun.* **7**, 10763 (2016).
- 686 42. Van Dort, C. J. *et al.* Optogenetic activation of cholinergic neurons in the PPT or LDT induces  
687 REM sleep. *Proc. Natl. Acad. Sci.* (2015). doi:10.1073/pnas.1423136112
- 688 43. GOTTESMANN, C. The Transition from Slow-wave Sleep to Paradoxical Sleep: Evolving Facts  
689 and Concepts of the Neurophysiological Processes Underlying the Intermediate Stage of Sleep.  
690 *Neurosci. Biobehav. Rev.* **20**, 367–387 (1996).
- 691 44. Neckelmann, D., Olsen, O. E., Fagerland, S. & Ursin, R. The reliability and functional validity of  
692 visual and semiautomatic sleep/wake scoring in the Moll-Wistar rat. *Sleep* (1994).

693 doi:10.1093/sleep/17.2.120

694 45. Gandolfo, G., Romettino, S., Gottesmann, C., Van Luijtelaaar, G. & Coenen, A. Genetically epileptic  
695 rats show a pronounced intermediate stage of sleep. *Physiol. Behav.* **47**, 213–215 (1990).

696 46. Lairy, G. C. Données récentes sur la physiologie et la physiopathologie de l'activité onirique.  
697 Données EEG chez le malade mental. *IV World Congr. Psychiatry* **1**, 189–197 (1966).

698 47. Gervasoni, D. Global Forebrain Dynamics Predict Rat Behavioral States and Their Transitions. *J.*  
699 *Neurosci.* **24**, 11137–11147 (2004).

700 48. Pitkänen, A., Ekolle Ndode-Ekane, X., Lapinlampi, N. & Puhakka, N. Epilepsy biomarkers –  
701 Toward etiology and pathology specificity. *Neurobiology of Disease* (2019).

702 doi:10.1016/j.nbd.2018.05.007

703 49. Andrade, P., Nissinen, J. & Pitkänen, A. Generalized Seizures after Experimental Traumatic Brain  
704 Injury Occur at the Transition from Slow-Wave to Rapid Eye Movement Sleep. *J. Neurotrauma*  
705 (2017). doi:10.1089/neu.2016.4675

706 50. Kaur, S., Junek, A., Black, M. A. & Semba, K. Effects of Ibotenate and 192IgG-Saporin Lesions of  
707 the Nucleus Basalis Magnocellularis/Substantia Innominata on Spontaneous Sleep and Wake  
708 States and on Recovery Sleep after Sleep Deprivation in Rats. *J. Neurosci.* (2008).

709 doi:10.1523/jneurosci.1585-07.2008

710 51. Gerashchenko, D., Chou, T. C., Blanco-Centurion, C. A., Saper, C. B. & Shiromani, P. J. Effects of  
711 Lesions of the Histaminergic Tuberomammillary Nucleus on Spontaneous Sleep in Rats. *Sleep* **27**,  
712 1275–1281 (2004).

713 52. Webster, H. H. & Jones, B. E. Neurotoxic lesions of the dorsolateral pontomesencephalic  
714 tegmentum-cholinergic cell area in the cat. II. Effects upon sleep-waking states. *Brain Res.* (1988).

715 doi:10.1016/0006-8993(88)90471-4

716 53. Shouse, M. N. & Siegel, J. M. Pontine regulation of REM sleep components in cats: integrity of the  
717 pedunculo-pontine tegmentum (PPT) is important for phasic events but unnecessary for atonia

718 during REM sleep. *Brain Res.* **571**, 50–63 (1992).

719 54. Blanco-Centurion, C., Gerashchenko, D. & Shiromani, P. J. Effects of Saporin-Induced Lesions of  
720 Three Arousal Populations on Daily Levels of Sleep and Wake. *J. Neurosci.* **27**, 14041–14048  
721 (2007).

722

723

724

725

726

727

728

729

730

731

732

733

734

735

736

737

## 738 Supplementary Material

| Animal #<br>(Sex)                              | Days Recorded<br>[# of Sessions] | PPT                              |         | LDT                             |         | DR                                               | LC    | VLPO<br>Right |
|------------------------------------------------|----------------------------------|----------------------------------|---------|---------------------------------|---------|--------------------------------------------------|-------|---------------|
|                                                |                                  | Left                             | Right   | Left                            | Right   |                                                  |       |               |
| 1 (M)                                          | 41 [13]                          |                                  |         |                                 |         | 47 (23)                                          |       |               |
| 2 (M)                                          | 37 [12]                          | 42 (21)                          | 33 (13) |                                 |         | 43 (17)                                          |       |               |
| 3 (M)                                          | 57 [9]                           | 29 (19)                          | 29(8)   |                                 |         | 18 (10)                                          |       |               |
| 4 (M)                                          | 73 [12]                          | 7 (1)                            |         |                                 |         | 18 (7)                                           |       |               |
| 5 (M)                                          | 66 [10]                          | 20 (9)                           |         |                                 | 14 (4)  | 27 (10)                                          |       |               |
| 6 (M)                                          | 43 [8]                           | 24 (20)                          |         |                                 | 29 (22) | 32 (11)                                          |       | 26 (10)       |
| 7 (F)                                          | 39 [7]                           |                                  | 6 (4)   | 19 (12)                         |         | 3 (2)                                            |       | 9 (4)         |
| 8 (F)                                          | 54 [9]                           | K                                |         |                                 | 47 (28) | 44 (31)                                          |       |               |
| 9 (M)                                          | 57 [9]                           | 8 (6)                            |         |                                 | 43 (21) | 23 (3)                                           |       | 13 (5)        |
| 10 (M)                                         | 34 [8]                           |                                  | 42 (27) | K                               |         | 15 (9)                                           |       | 16 (6)        |
| 11 (M)                                         | 29 [8]                           |                                  | 25 (17) | 30 (19)                         |         |                                                  |       | 16 (5)        |
| 12 (M)                                         | 39 [6]                           |                                  | 30 (14) | 16 (7)                          |         | K                                                | 4 (0) | 8 (3)         |
| Total Neuron Count<br>SOV-Dependent Neurons () |                                  | 295 (159)                        |         | 198 (113)                       |         | 270 (123)                                        | 4 (0) | 88 (33)       |
|                                                |                                  |                                  |         |                                 |         |                                                  |       |               |
|                                                |                                  | Record & Histological validation |         | Record from target successfully |         | Record but no neuron crossing threshold (>7 std) |       |               |

739  
740 **Table S1. Detailed recording information from brainstem-hypothalamic structures.** The cells  
741 include information about which targets were recorded from successfully as well as the number  
742 of well-defined SOV-dependent and total units counted over the entire course of recordings for  
743 each axis and animal. The final row is the sum of SOV and total units over all animals in the cohort.  
744 Animals 1-5 had three Microdrive axes, animals 6-11 had a total of four microdrive axes, and  
745 animal 12 had a total of five microdrive axes. Formatting of cells refer to the following conditions:  
746 recorded units with histological validation that the electrodes hit the target (green); recorded  
747 units with no histological validation (orange). For this group the state-dependency of the unit-  
748 recordings was established based on EEG and behavioral measures; recorded activity but no units  
749 crossed the 7 SD threshold (red). Some implanted microwire bundles were kinked (K) during the  
750 Microdrive implant procedure or later driving sessions, which prevented electrodes from driving.  
751 Sessions were continuous recording periods between electrode-driving sessions. Recording  
752 sessions typically lasted between 3 and 10 days.

753

754 **Characterization of neural activity during state transitions**

755 Our main goal is to understand the role of brainstem and hypothalamic neurons in the emergence  
756 of sleep-wake states and the transitions between them. By clarifying the temporal relationship  
757 between spontaneous neuronal activity and state transitions in freely behaving animals, we can  
758 elucidate the role of specific cell-groups in the initiation or maintenance of a SOV. Therefore, we  
759 acquired simultaneous measurements of single- and multi-unit activity from a subset of the sleep-  
760 wake regulatory cell-groups as well as hippocampal LFP and ECoG.

761 As described in the methods, SOV and state transition times were defined from the hippocampal,  
762 cortical, and behavioral signs of the state <sup>1</sup>, using spectral features of the hippocampal LFP,  
763 ECoG, and head acceleration.

764 We first examined the activity of each identified neuron during all states of vigilance. We extracted  
765 the firing rates for the identified neurons and validated their location via histological analysis. An  
766 example of these processing and analysis steps for an identified REM-active neuron in the PPT  
767 cell-group is shown in Fig. S1. The data shown are from one animal, over all IS to REM instances  
768 ( $n = 168$ ) in one 5-day recording session. The histological analysis (Fig. S1A) confirmed that the  
769 electrode was in PPT. Likewise, the neuron's waveform (Fig. S1B) and inter-spike interval  
770 histogram (ISIH) is consistent with cholinergic cells of the PPT (Fig. S1C) <sup>2-5</sup>.

771 Every detected spike of this particular neuron during every IS to REM transition was marked  
772 (raster plot in Fig. S1D upper panel) and the average state-conditioned firing rate, as a function  
773 of time with respect to transition time, was computed. The average state conditioned firing rate  
774 (over all REM to IS incidents) for this particular PPT neuron during both the IS and REM is shown  
775 in black traces in the bottom panel of Fig. S1D. Consistent with a REM-active neuron (one whose  
776 activity is high during REM) the average firing rate is nearly constant for times positive with respect  
777 to the transition time, which is consistent with the raster-plot having consistent firing in the green-

778 shaded regions (Fig. S1D upper panel). Note that the variance in firing rate goes up for large  
779 time periods because there are fewer very long REM periods over which it is calculated.

780 To calculate changes in firing rate during state transitions, we used Poisson statistics. The pre-  
781 transition average firing rate over many trials formed the reference distribution. An example of the  
782 mean of the average firing rate distribution during the all the ISs is indicated by the solid dashed  
783 line in the lower panel of Fig. S1D. We then used the cumulative distribution function with 1%-  
784 99% confidence intervals to find the post-transition instantaneous firing rate outside of the  
785 confidence bounds. The time point associated with the significantly different instantaneous firing  
786 rate was then determined as  $t_{sig}$ . The orange dashed line in the lower panel of Fig. S1D indicated  
787 the  $t_{sig}$  for this specific neuron.

788 In addition to the state-conditioned firing rates, we simultaneously compute and report the  
789 probability of being in a state,  $P(\text{state})$ . The green and magenta lines in the bottom panel of  
790 Fig. S1D indicate the  $P(\text{IS})$  and  $P(\text{REM})$ . By construction, according to the homeostatic sleep  
791 drive, once the dynamics transition into a state, the probability of staying in that state  
792 monotonically decreases over time. The  $P(\text{state})$  shown in Fig. S1D is an example of this  
793 phenomenon, where the  $P(\text{REM})$  monotonically decreases during time spent in REM.

794 The procedural steps detailed in Fig. S1 for one PPT neuron were implemented to collect the  
795 state-conditioned firing rates and  $P(\text{state})$  for all identified neurons as well as for all periods before  
796 and after every allowed transition type.

797

798

799

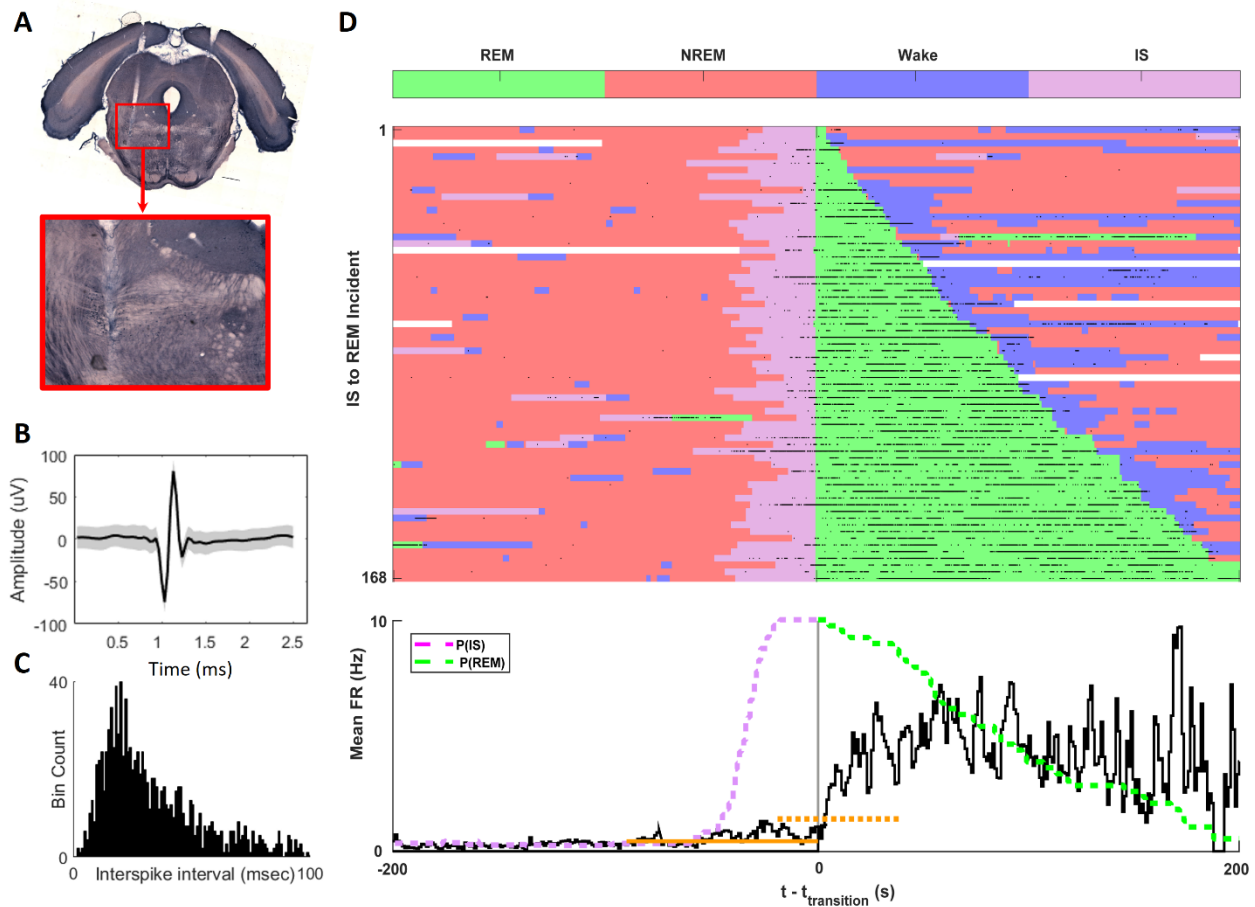

800

801 **Figure S1. Activity analysis of a representative REM-active PPT neuron. (A)** NADPH-stained  
802 coronal section of the brain show the cholinergic population in the PPT as well as the electrode  
803 track in the PPT. **(B)** Average waveform of the identified action potential for one PPT neuron over  
804 one 5-day long driving session. **(C)** The inter-spike interval (ISI) of the neuron. **(D)** Peri-REM firing  
805 rate of a PPT neuron in one animal. The raster plot is ranked according to the duration of REM  
806 bouts and with respect to time since transition into REM. The firing activity of the neuron is  
807 indicated by the black markers. In a raster plot format they each indicate every time an action  
808 potential is recorded. We calculated the probability of each state given time from state onset;  
809 indicated by the dashed lines in the bottom panel (magenta for IS; P(IS) and green for REM;  
810 P(REM)). On average, the PPT neuron fires much more infrequently during the IS bout, and only  
811 significantly increases its activity during REM (green area). The significance is calculated based

812 on the Poisson statistics, where the reference firing rate distribution is the average firing rate of  
813 the prior state (here, IS) over many trials indicated by the solid orange line. The time point when  
814 the instantaneous firing rate falls out of the 1%-99% confidence bounds is marked as  $t_{\text{sig}}$  marked  
815 here by the orange dashed line. As  $P(\text{REM})$  decays, so does the average firing rate. The average  
816 firing rate here indicates the neuronal activity conditioned on state and is calculated in 1 second  
817 bins. The probability traces are rescaled from [0,1] to [0,10] to match the scale of the average  
818 firing rate.

819

820



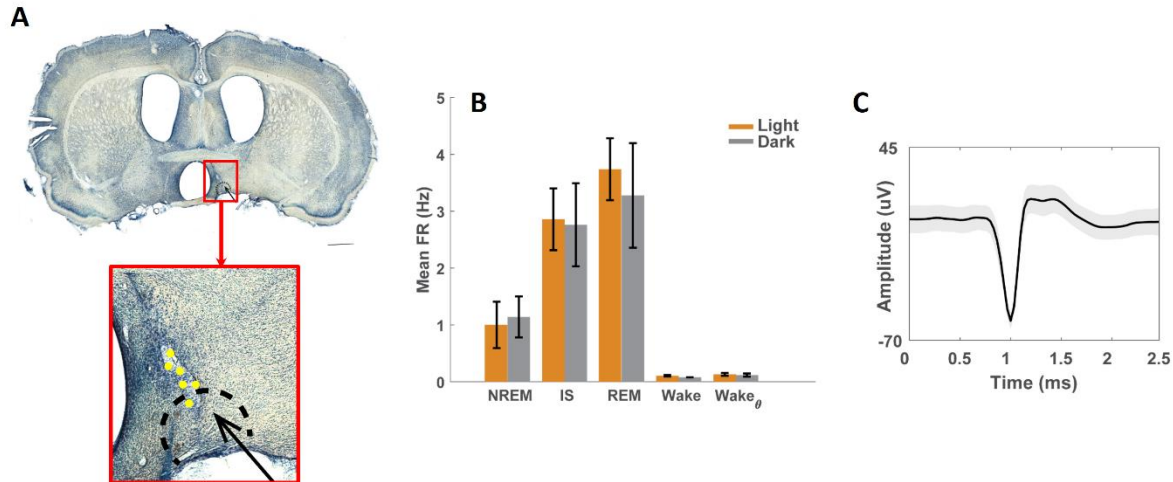

821

822 **Figure S2. Identified neurons in lateral hypothalamus are active during the intermediate**  
823 **state.** A group of neurons were identified on route to VLPO. **(A)** Example locations on the  
824 electrode track where these IS-active neurons were recorded are indicated by yellow markers.  
825 **(B)** These neurons are active during REM and IS bouts and increase their firing rate slightly upon  
826 transitions from IS to REM. However they are off during Wake. Based on histological analysis,  
827 their activity, and their average waveform **(C)** these neurons might be the ones in lateral  
828 hypothalamus that are shown to contain melatonin-concentrating hormone.

829

- 830 1. Datta, S. & MacLean, R. R. Neurobiological mechanisms for the regulation of mammalian sleep–  
831 wake behavior: reinterpretation of historical evidence and inclusion of contemporary cellular and  
832 molecular evidence. *Neurosci. Biobehav. Rev.* **31**, 775–824 (2007).
- 833 2. Grace, K. P., Vanstone, L. E. & Horner, R. L. Endogenous Cholinergic Input to the Pontine REM  
834 Sleep Generator Is Not Required for REM Sleep to Occur. *J. Neurosci.* **34**, 14198–14209 (2014).
- 835 3. Satoh, K. & Fibiger, H. C. Cholinergic neurons of the laterodorsal tegmental nucleus: Efferent and  
836 afferent connections. *J. Comp. Neurol.* (1986). doi:10.1002/cne.902530302
- 837 4. Van Dort, C. J. *et al.* Optogenetic activation of cholinergic neurons in the PPT or LDT induces REM  
838 sleep. *Proc. Natl. Acad. Sci.* (2015). doi:10.1073/pnas.1423136112
- 839 5. Datta, S. & Siwek, D. F. Single cell activity patterns of pedunculopontine tegmentum neurons  
840 across the sleep-wake cycle in the freely moving rats. *J. Neurosci. Res.* **70**, 611–621 (2002).

841
